# Supplementary material for: Hierachical Ni@Fe2O3superparticles through epitaxial growth of γ-Fe2O3nanorods onin situformed Ni nanoplates
Source: Royal Society of Chemistry journal article supplement (doi:10.1039/c6nr00065g), 2016-01-01
Supplement: c6nr00065g1.pdf [file c6nr00065g1.pdf]

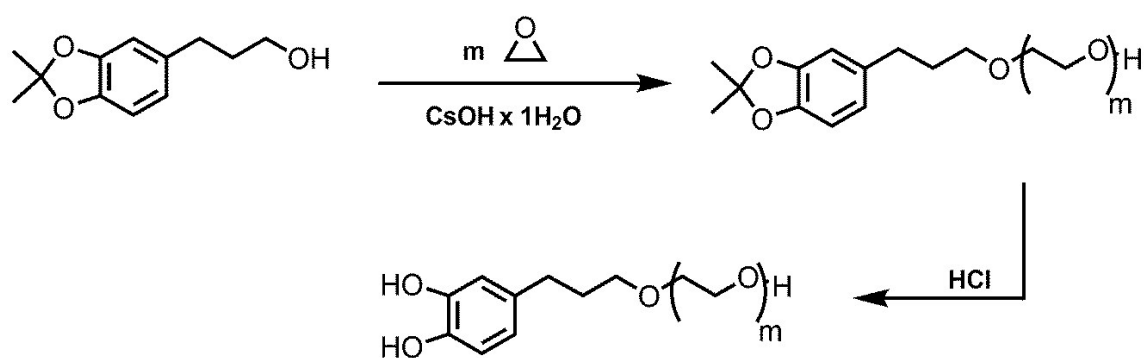

**Scheme S1.** Synthesis scheme of catechol-PEG: Polymerization of ethylene oxide (EO), followed by deprotection of CA-PEG with an aqueous solution of hydrochloric acid resulting in hydrophilic C-PEG.

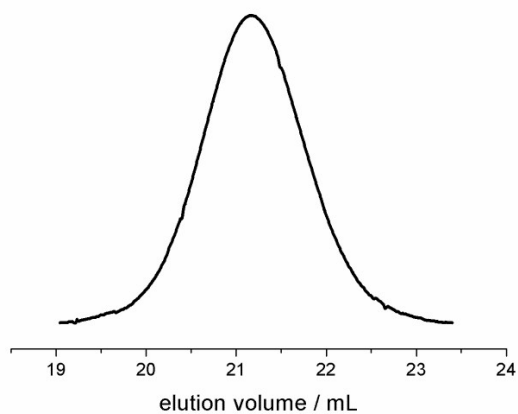

| Composition <sub>NMR</sub> | $M_{n,NMR}^a /$<br>g · mol <sup>-1</sup> | $M_{n,GPC}^b /$<br>g · mol <sup>-1</sup> | $M_{w,GPC}^b /$<br>g · mol <sup>-1</sup> | $M_w/M_n^b$ |
|----------------------------|------------------------------------------|------------------------------------------|------------------------------------------|-------------|
| CA-PEG <sub>67</sub>       | 3160                                     | 2450                                     | 2610                                     | 1.07        |

<sup>a</sup>Calculated from <sup>1</sup>H-NMR spectrum. <sup>b</sup>Determined by GPC in DMF (RI, PEG standard).

**Figure S1.** GPC trace (RI, DMF, PEG standard) of CA-PEG<sub>67</sub>.

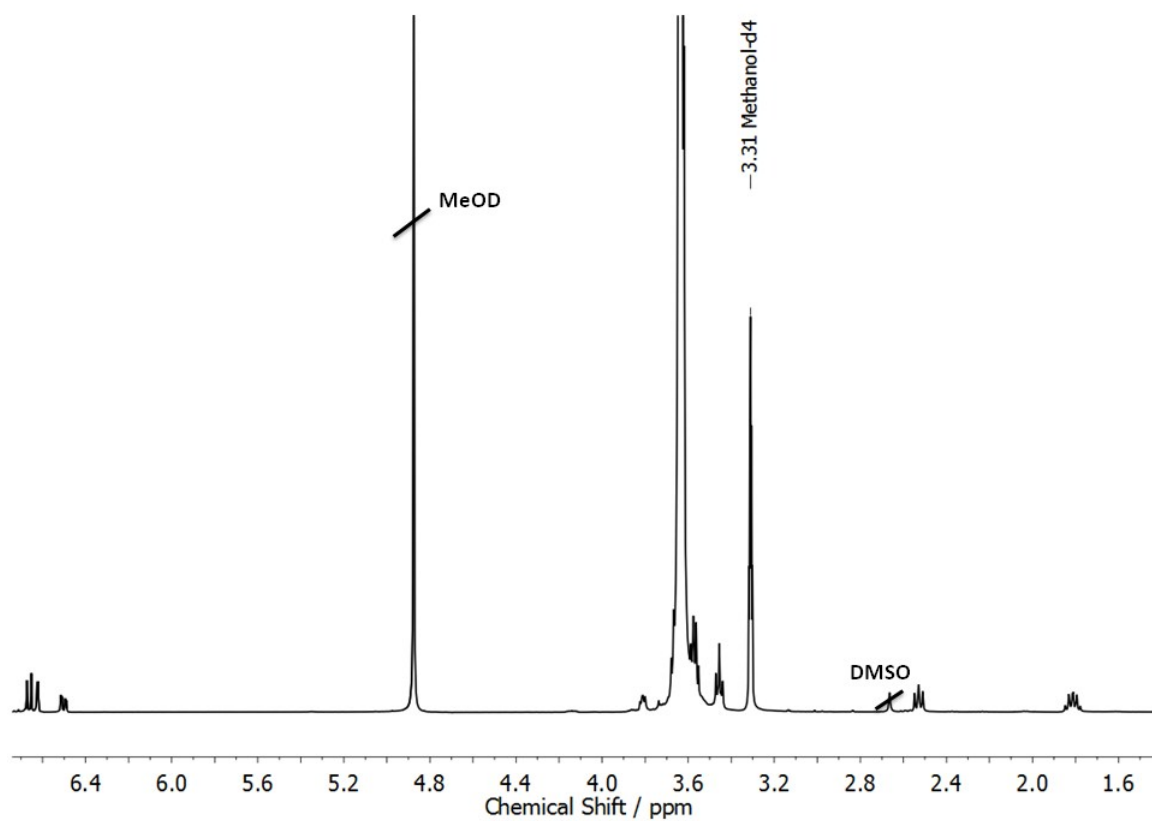

**Figure S2.**  $^1\text{H}$  NMR spectrum (400 MHz, methanol- $d_4$ ) of catechol-PEG (C-PEG<sub>67</sub>) after release of the protecting groups.

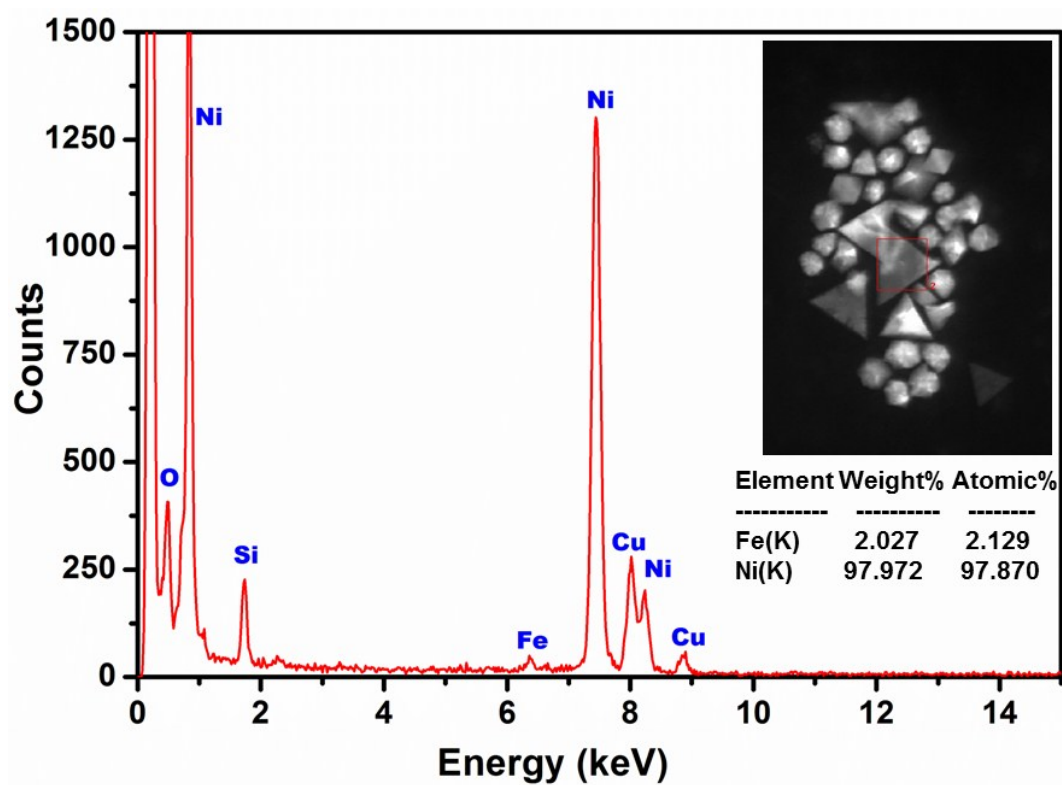

**Figure S3.** EDX spectrum from  $\text{Ni}_{0.95}\text{Fe}_{0.05}$  precursors after a reaction time of 6 minutes.

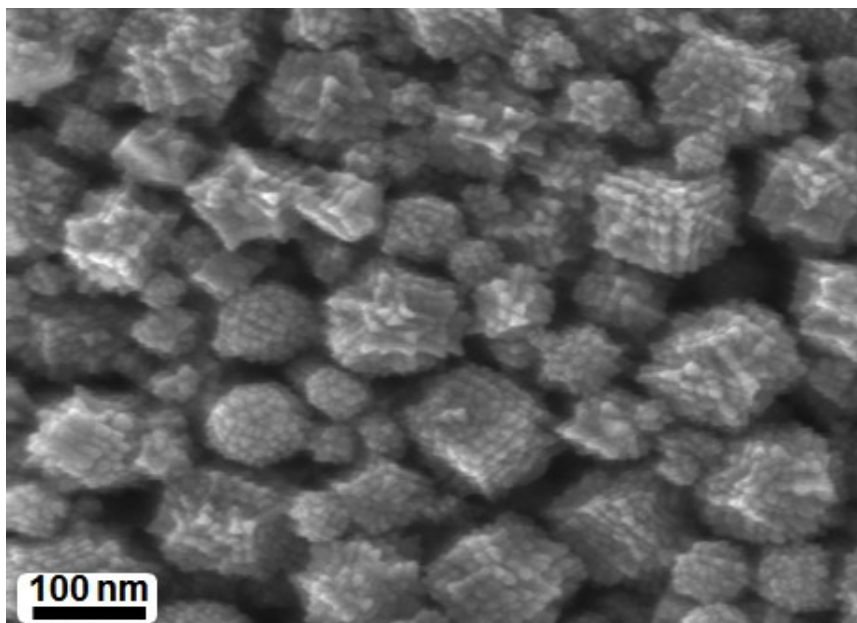

Fig. S4: An SEM image to confirm a better overview and hierarchical arrangements of nanodomains in three dimensional (3D) patterns

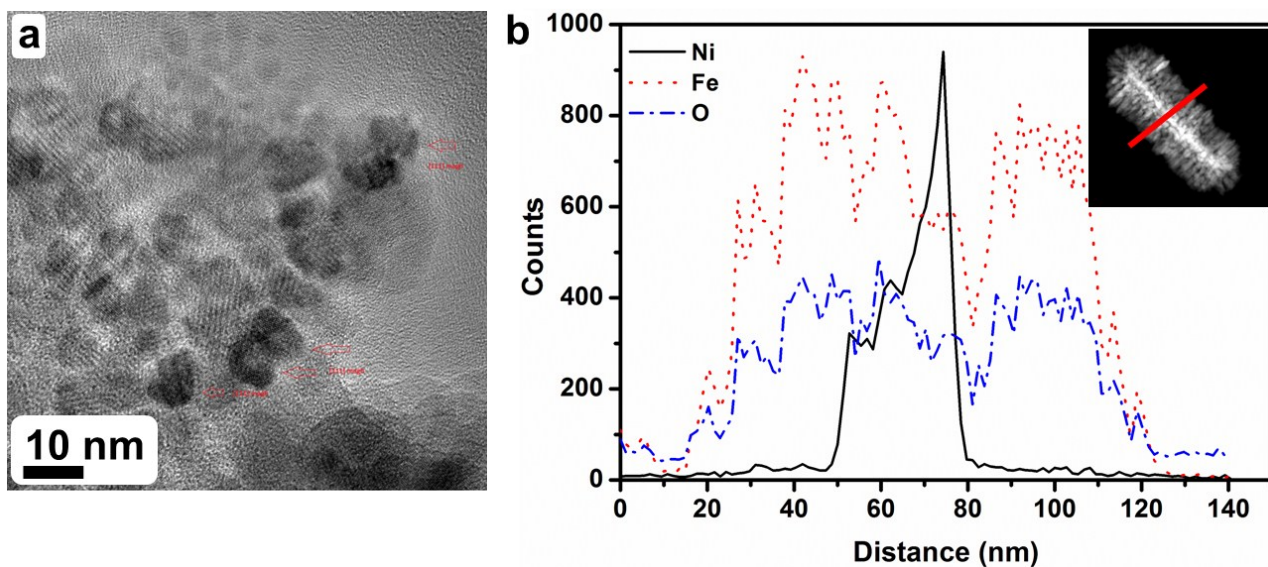

**Figure S5.** (a) HRTEM of a superparticle showing that all the rods growing on the flat surface have the same orientation, with [111] as the main direction of growth (b) z-contrast image (STEM) of a plate standing on the short side (inset) and corresponding line scan elemental analysis to confirm hierarchically organized iron oxide around nickel nanoplates.

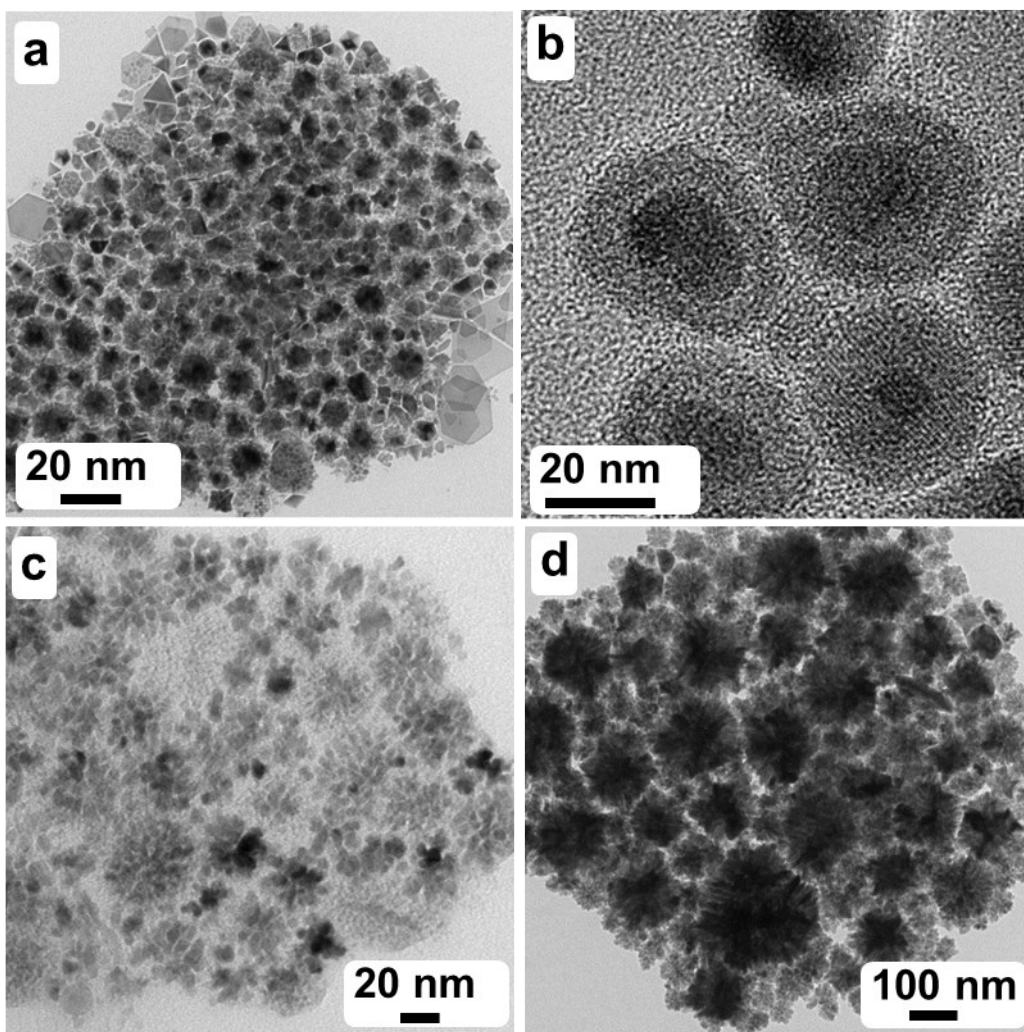

**Figure S6.** TEM images of (a)  $\text{Ni}_{0.95}\text{Fe}_{0.05}@\gamma\text{-Fe}_2\text{O}_3$  nanoparticles when  $\text{Fe}(\text{CO})_5$  was injected at 180 °C (b) at 240 °C and varying the amount of injected  $\text{Fe}(\text{CO})_5$ , 10  $\mu\text{L}$  (c) and 200  $\mu\text{L}$  (d).

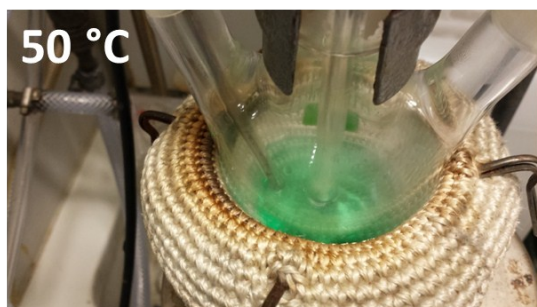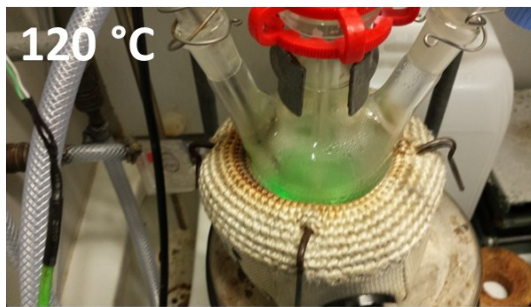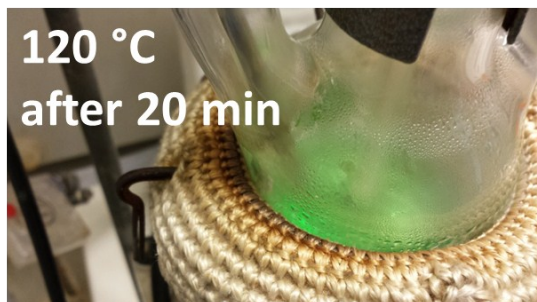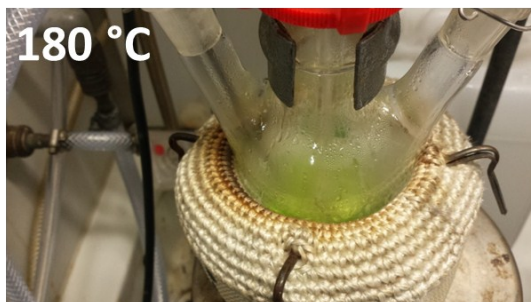

**Figure S7.** Digital camera photograph of reaction flask at various temperatures in the absence of  $\text{Fe}(\text{CO})_5$ .



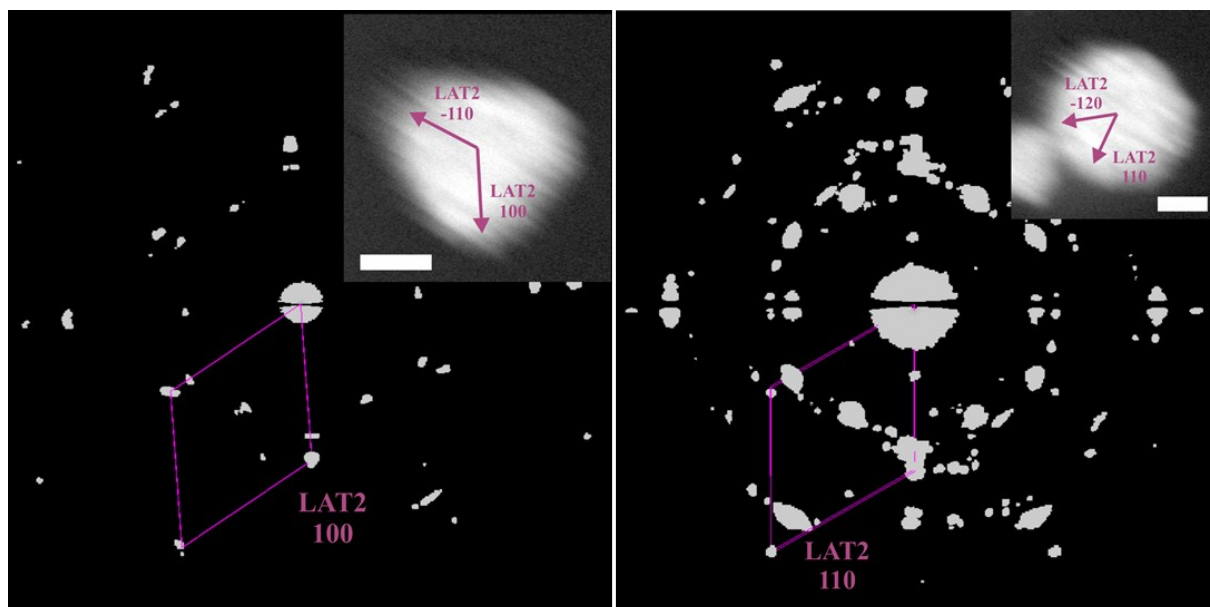

**Figure S8.** Orientation of LAT2 (in violet) in relation with the (a) triangular and (b) hexagonal shaped superparticles. Images were taken in STEM  $\mu$ -probe mode with an extremely reduced illumination. Three-dimensional diffraction reconstructions were performed by ADT. Scale bar: 100 nm.

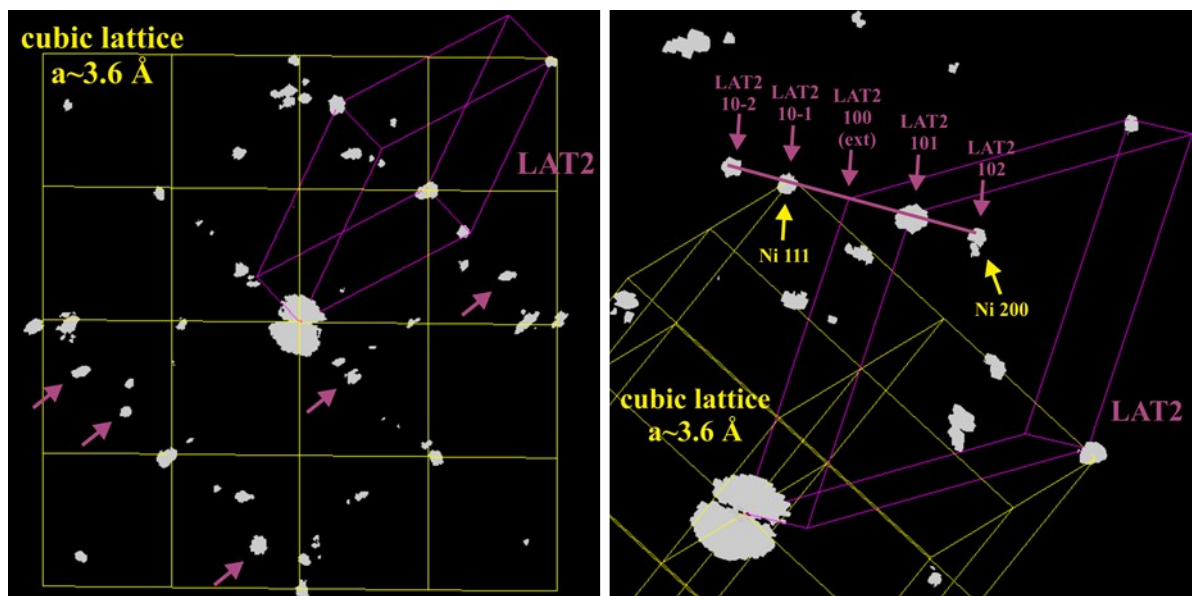

**Figure S9.** Geometrical relations between hexagonal LAT2 (in violet) and the commensurate cubic cell with  $a \sim 3.6 \text{ \AA}$  (in yellow) determined by P-XRP and reported in literature for  $\square$ -metals and permalloys. **(a)** View along  $(100)^*$  of the cubic cell, with LAT2 extra-reflections indicated by violet arrows. **(b)** Reciprocal lattice section showing the extra-reflections close to the 111 reflection of cubic Ni. Three-dimensional diffraction reconstructions were performed by ADT.

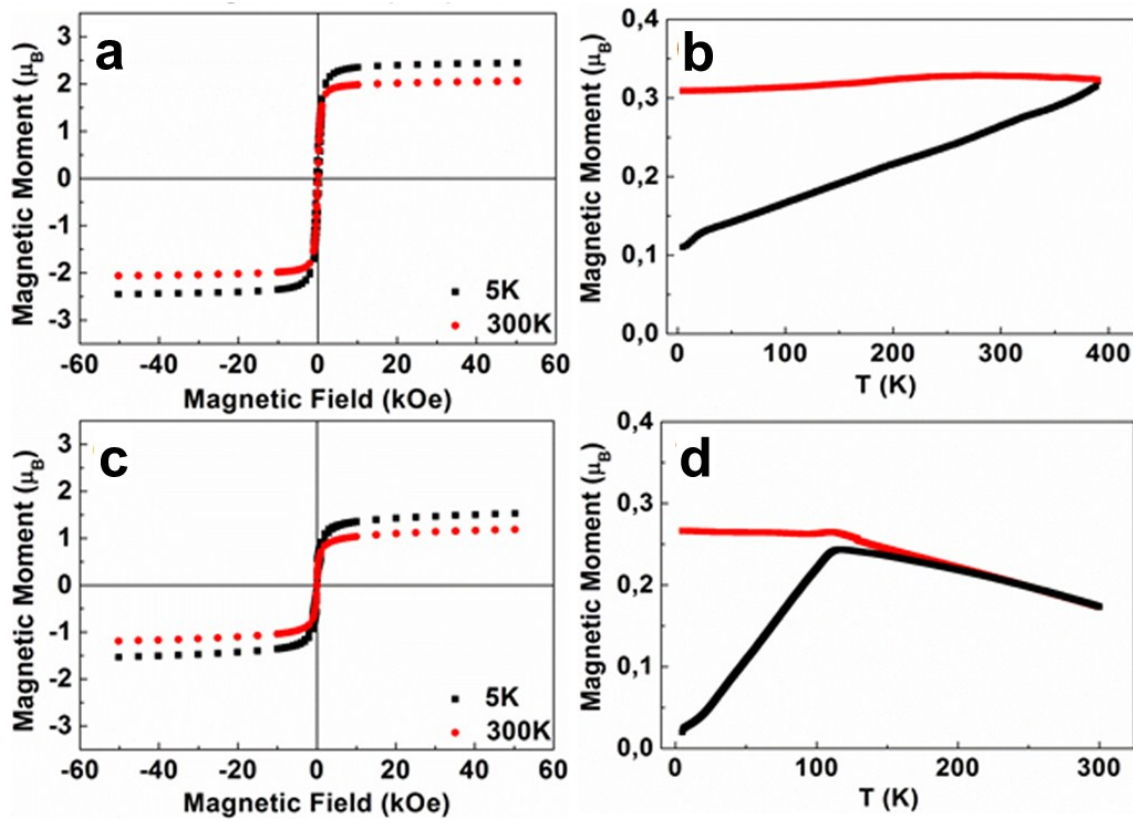

**Figure S10. Magnetic properties of the  $\text{Ni}@\gamma\text{-Fe}_2\text{O}_3$  core shell nanoparticles.** Magnetic hysteresis loops at 5 K and 300 K and temperature dependence of the magnetization in field-cooling (FC) and zero-field-cooling (ZFC) of  $\text{Ni}@\gamma\text{-Fe}_2\text{O}_3$  heterodimer nanoparticles (a,b) and core-shell nanoparticles (c,d) respectively.
